# Supplementary material for: Cannabinoid CB1 receptor gene inactivation in oligodendrocyte precursors disrupts oligodendrogenesis and myelination in mice
Source: Springer Nature journal article supplement (doi:10.1038/s41419-022-05032-z), 2022-07-07

**Supplemental Information for**

**Cannabinoid CB<sub>1</sub> receptor gene inactivation in oligodendrocyte precursors  
disrupts oligodendrogenesis and myelination in mice**

Aníbal Sánchez-de la Torre, Tania Aguado, Alba Huerga-Gómez, Silvia Santamaría, Antonietta Gentile, Juan Carlos Chara, Carlos Matute, Krisztina Monory, Susana Mato, Manuel Guzmán, Beat Lutz, Ismael Galve-Roperh & Javier Palazuelos

Corresponding author: Javier Palazuelos

Email: [j.palazuelos@ucm.es](mailto:j.palazuelos@ucm.es)

**This PDF file includes:**

Original Western blot scans

Biological replicates of western blot analysis shown in **Figure 2A**

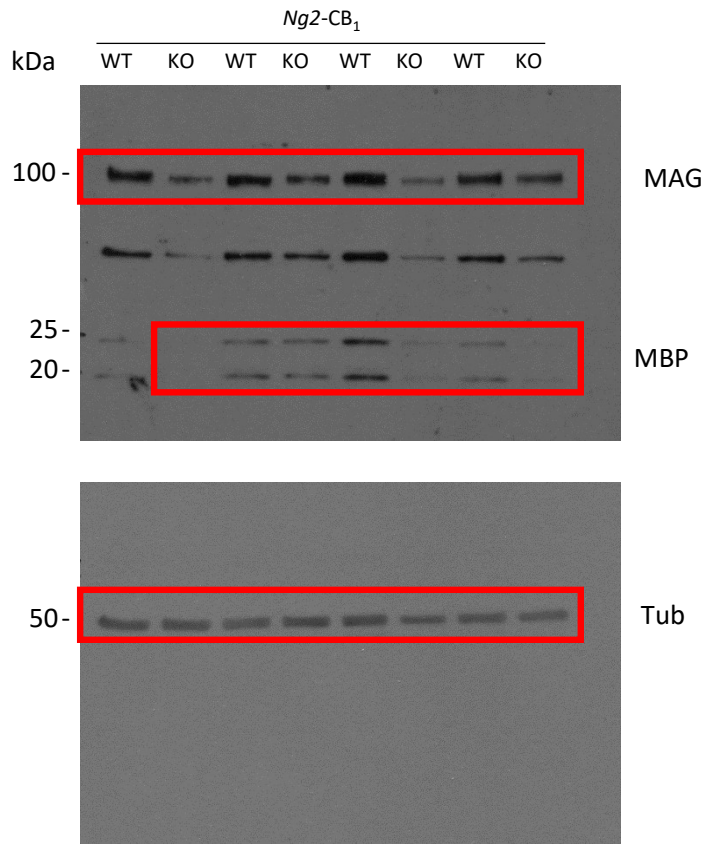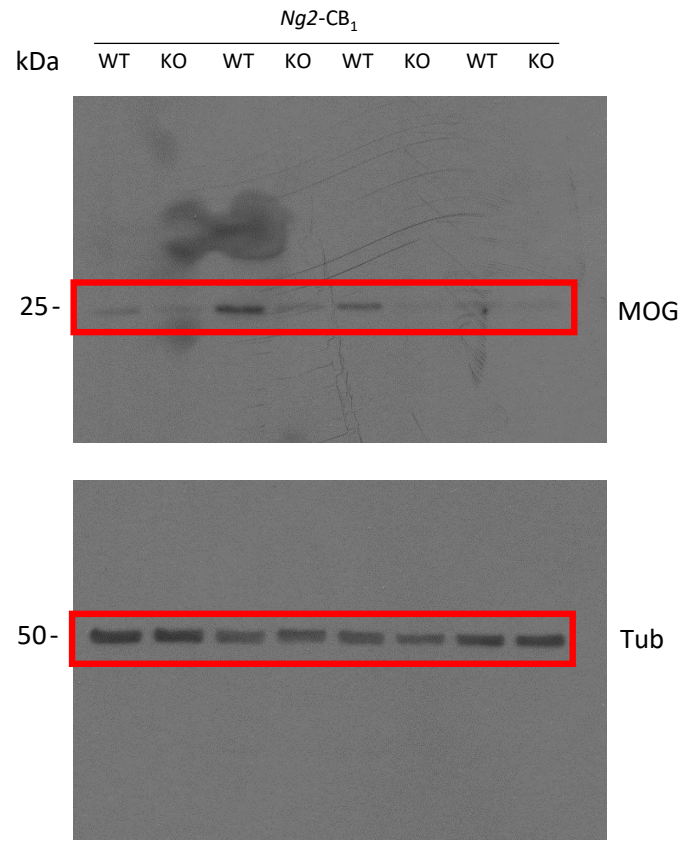

Biological replicates of western blot analysis shown in **Figure 2A**

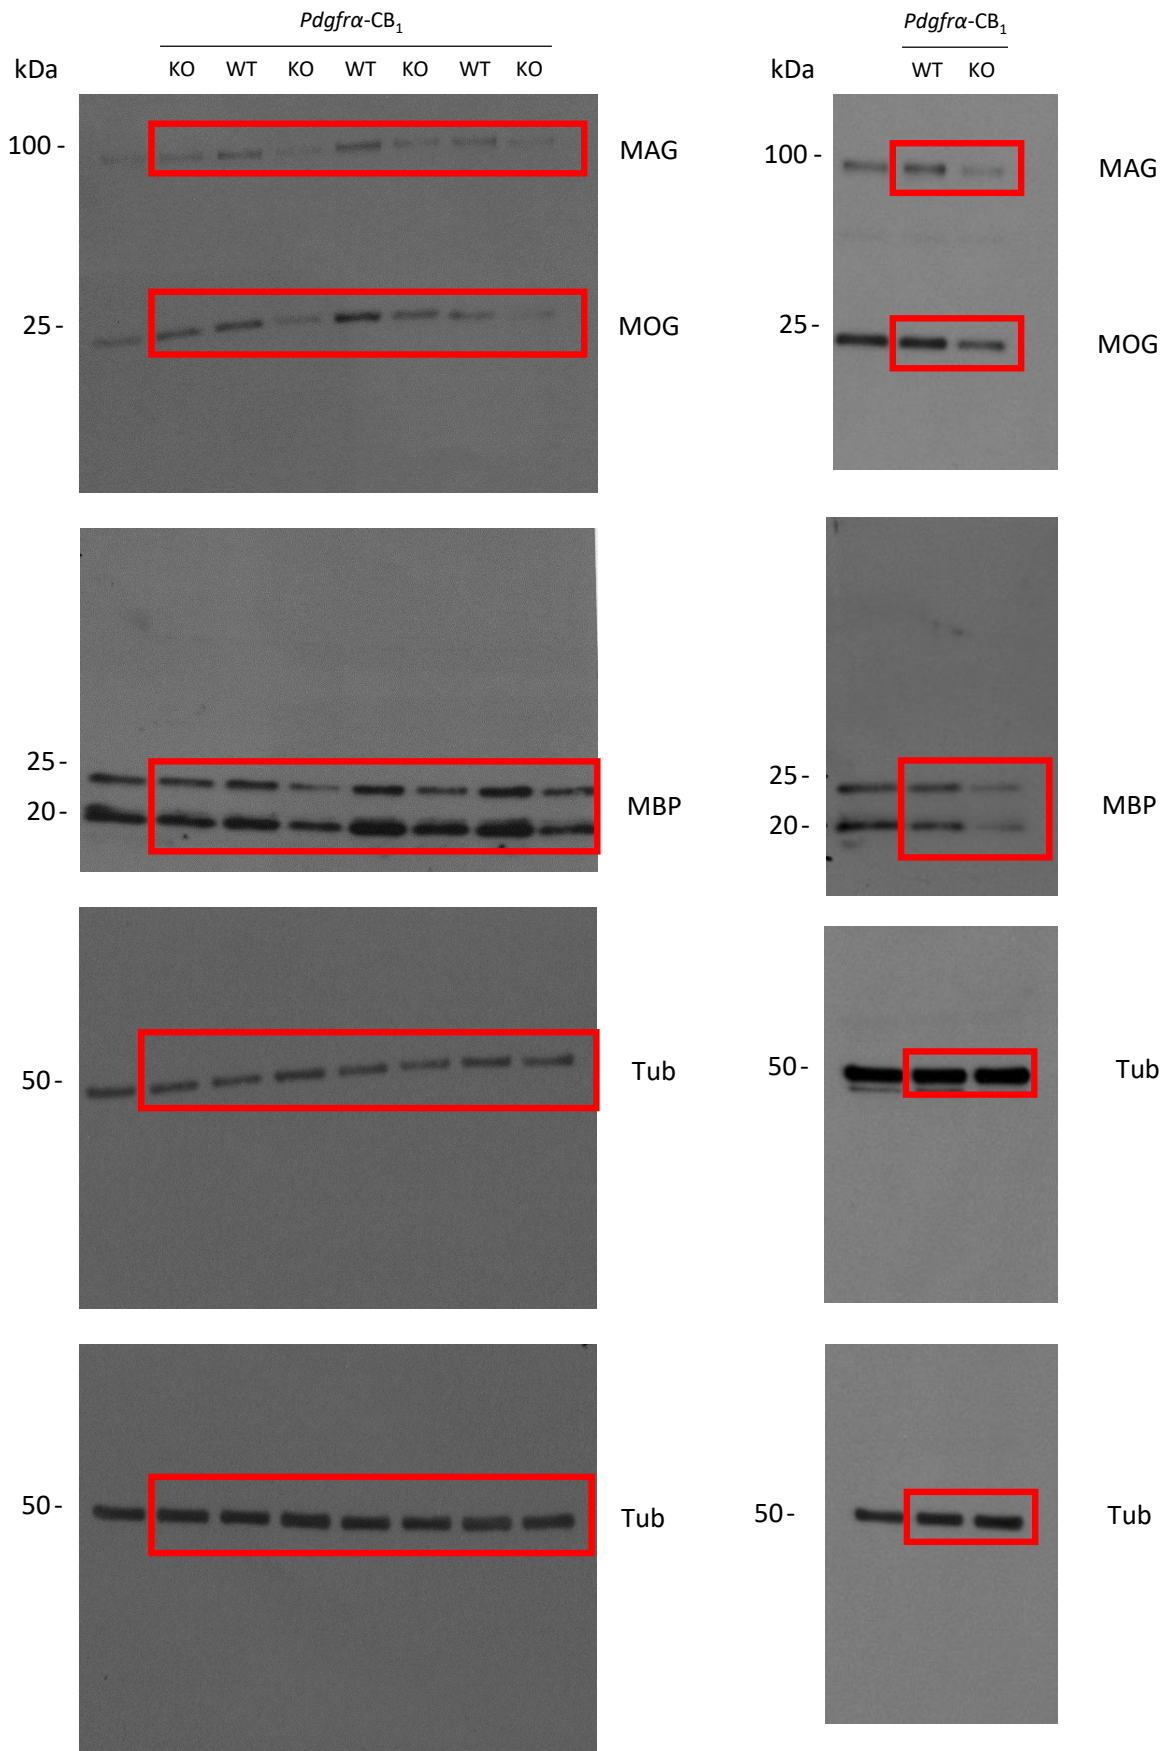

Biological replicates of western blot analysis shown in **Figure 2F**

CC

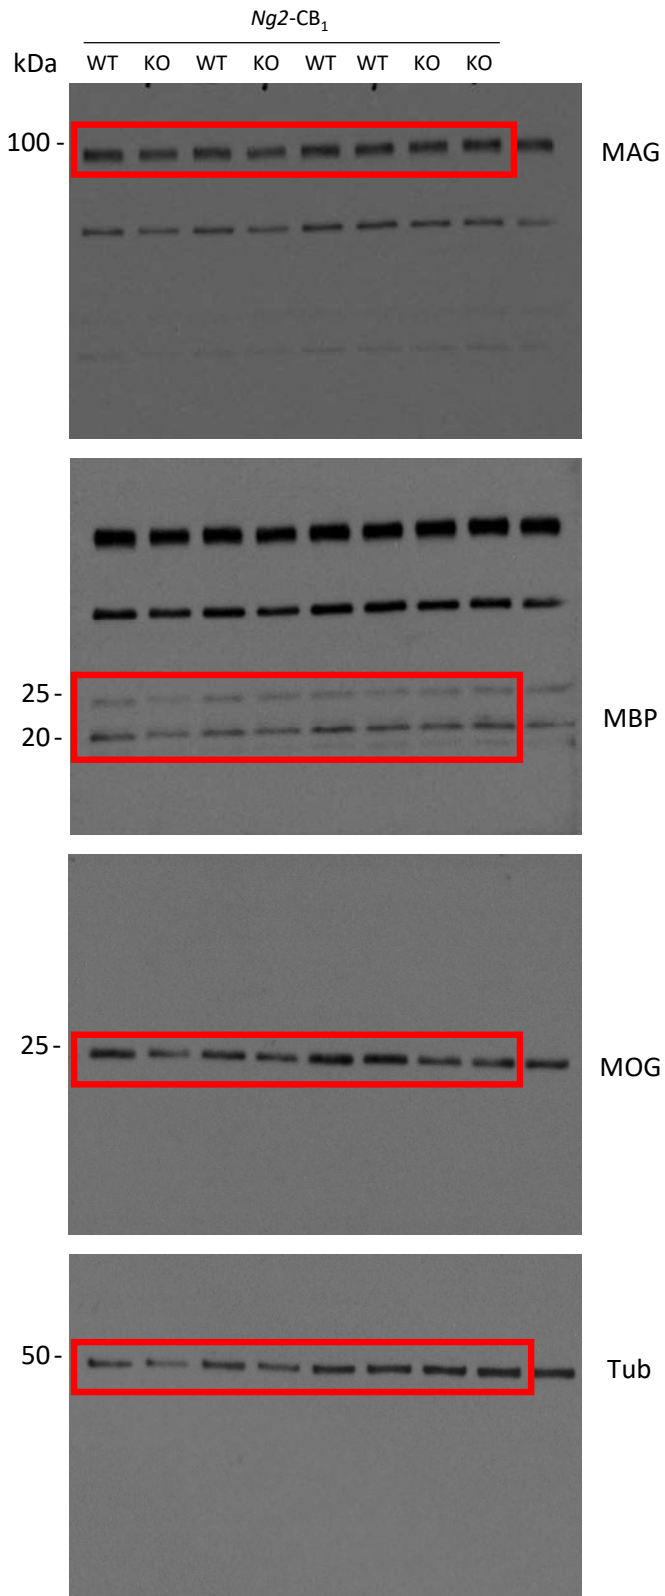

Crb

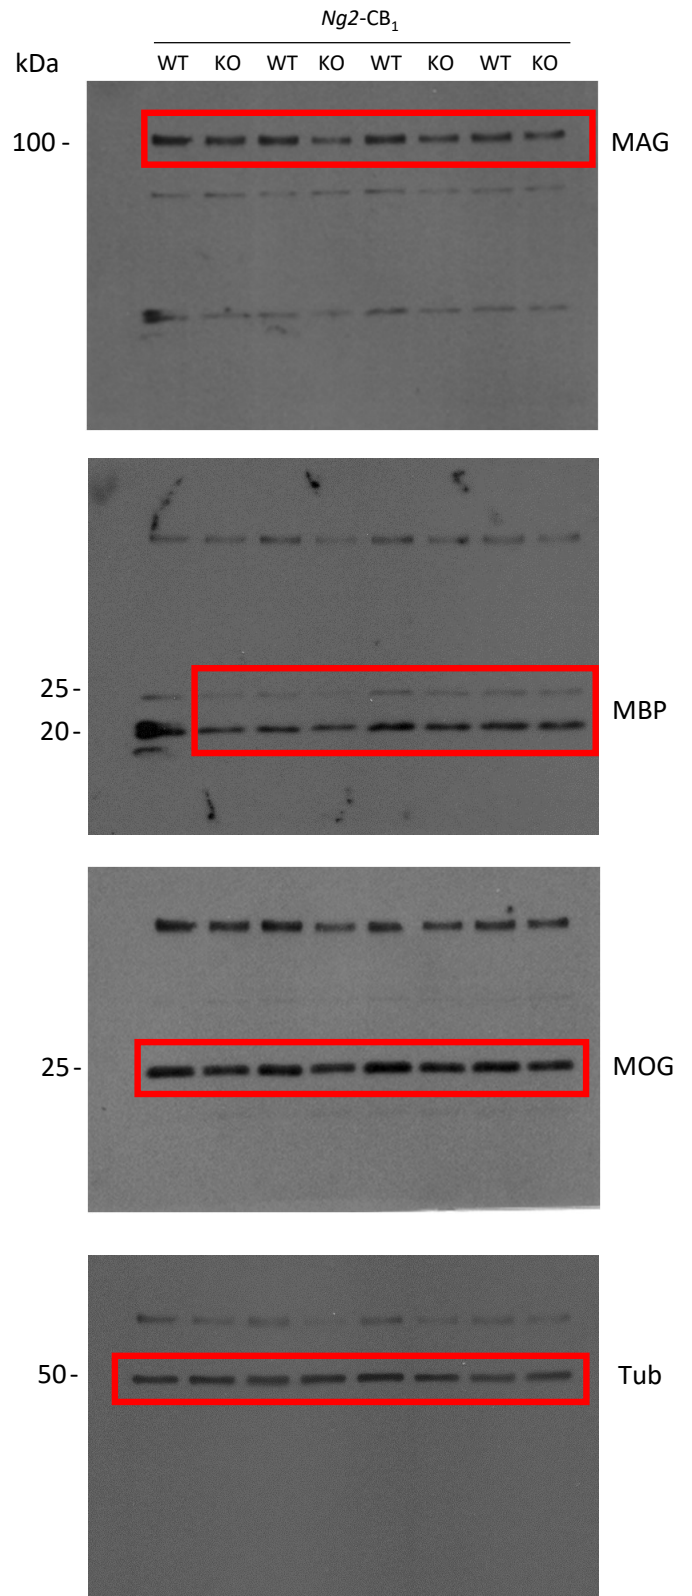

**Hipp**

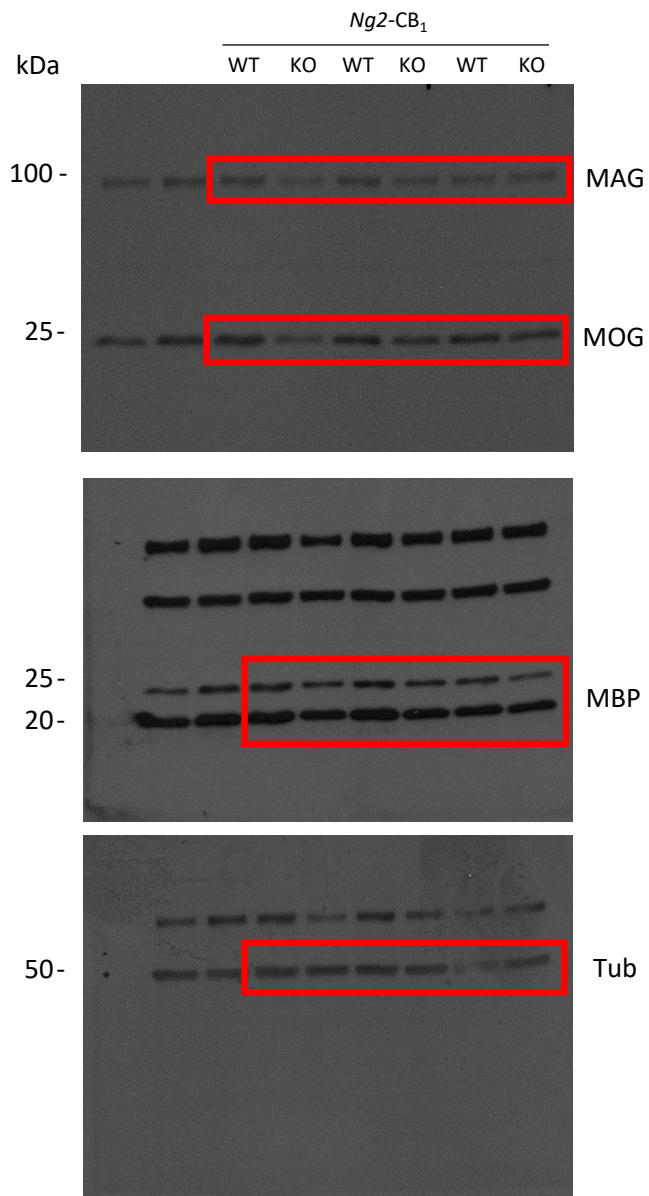



Biological replicates of western blot analysis shown in [Figure 4A](#)

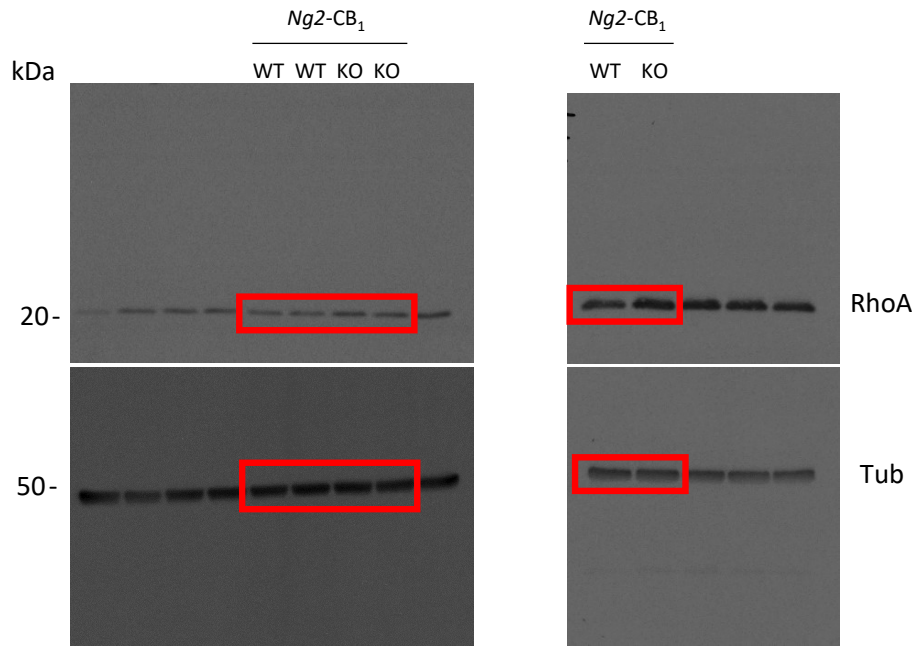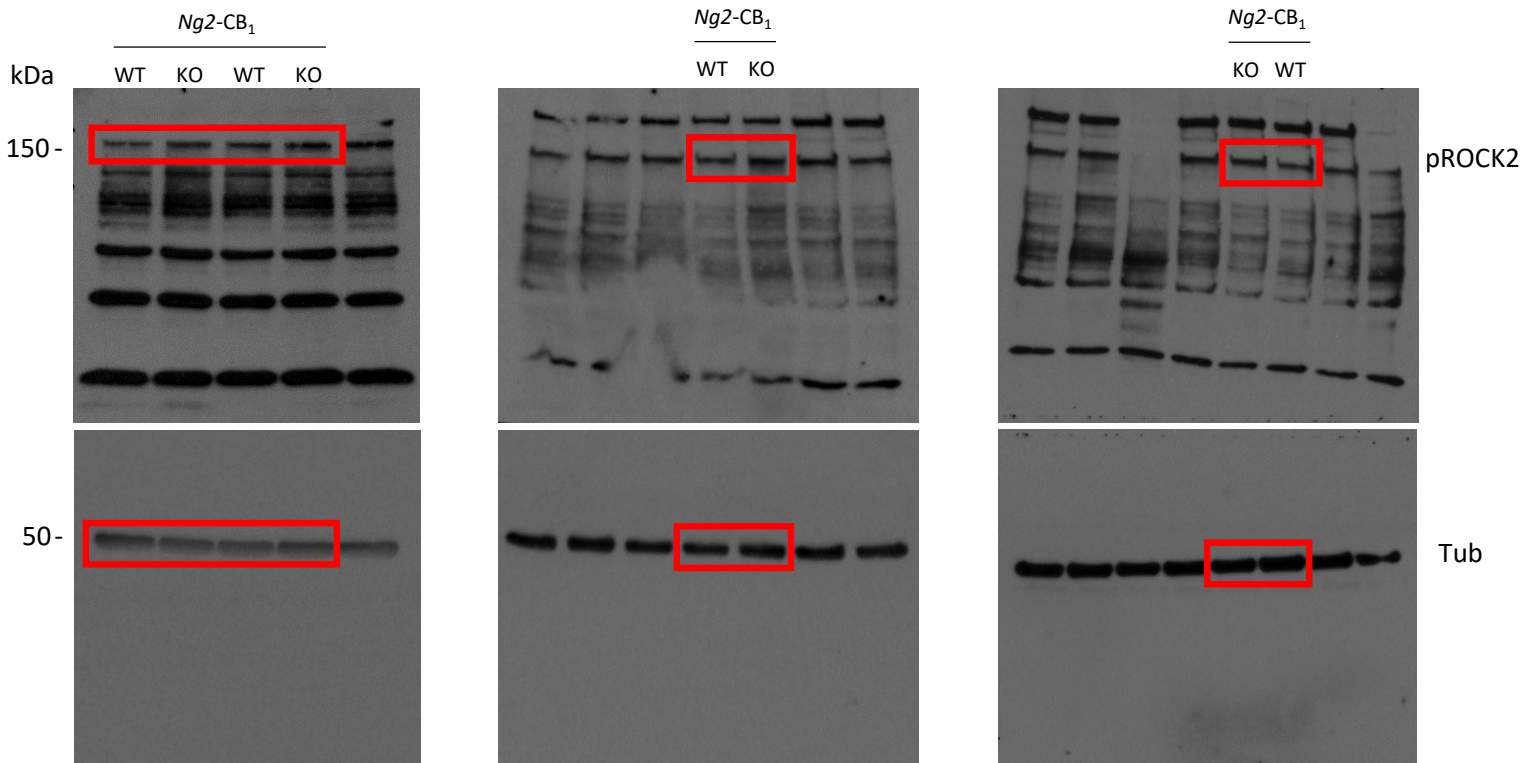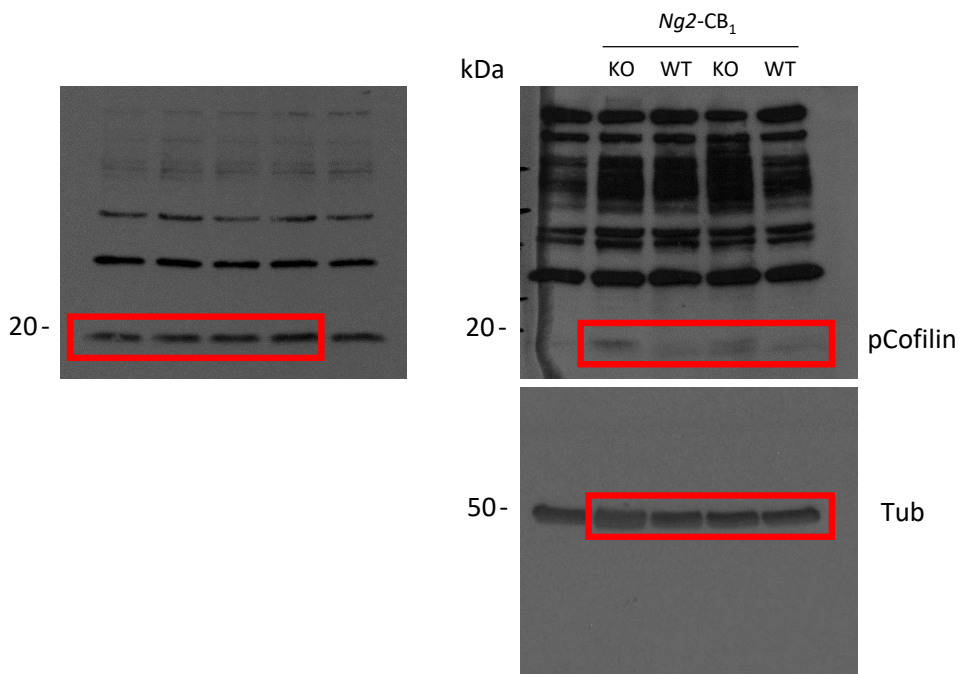

Biological replicates of western blot analysis shown in **Figure 4C**

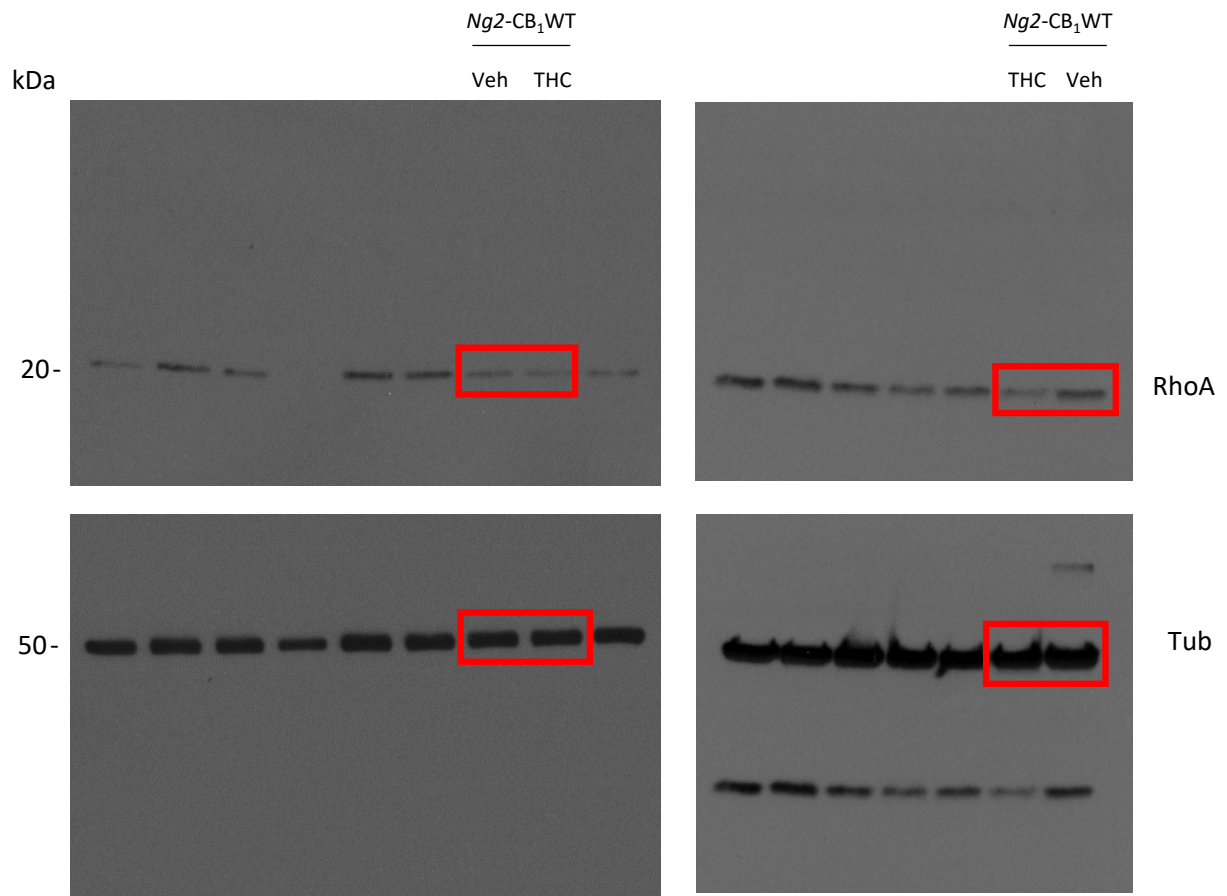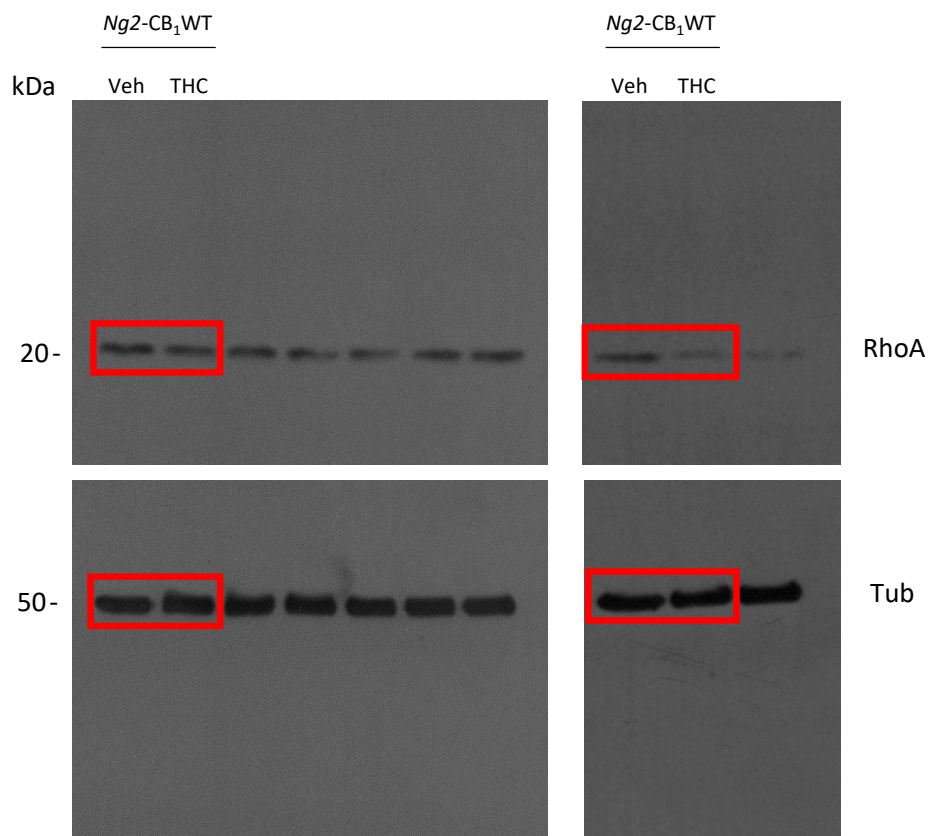

Biological replicates of western blot analysis shown in **Figure 4C**

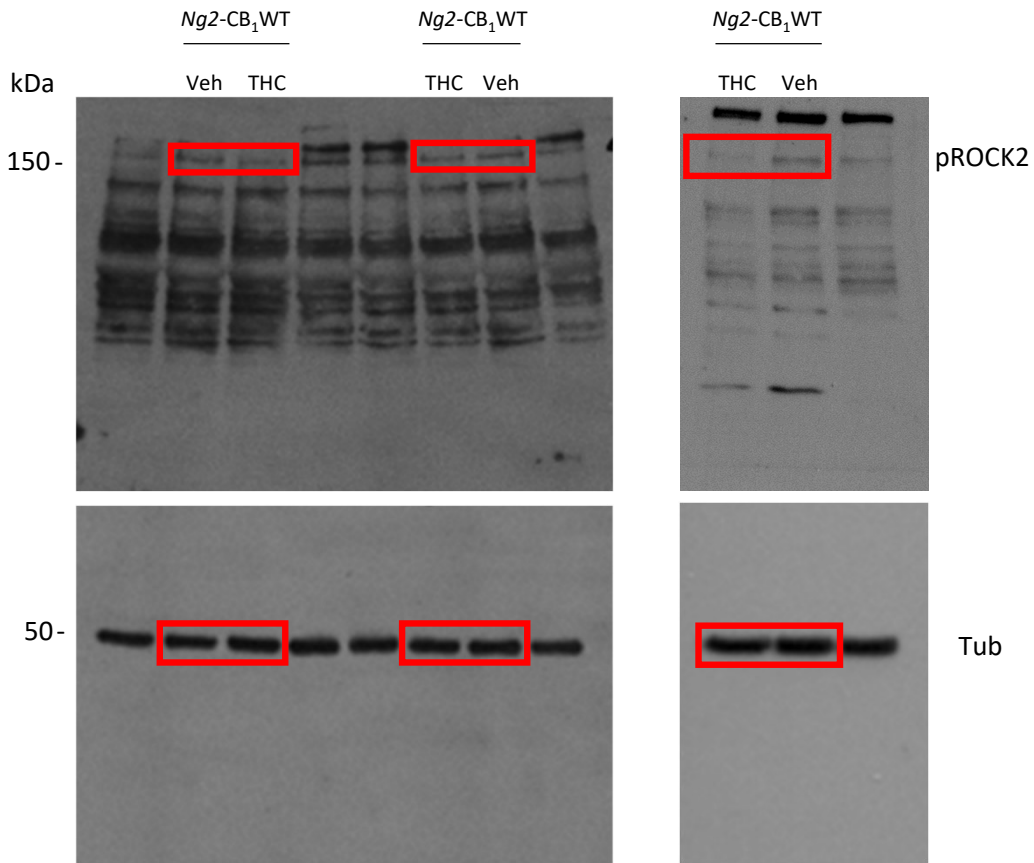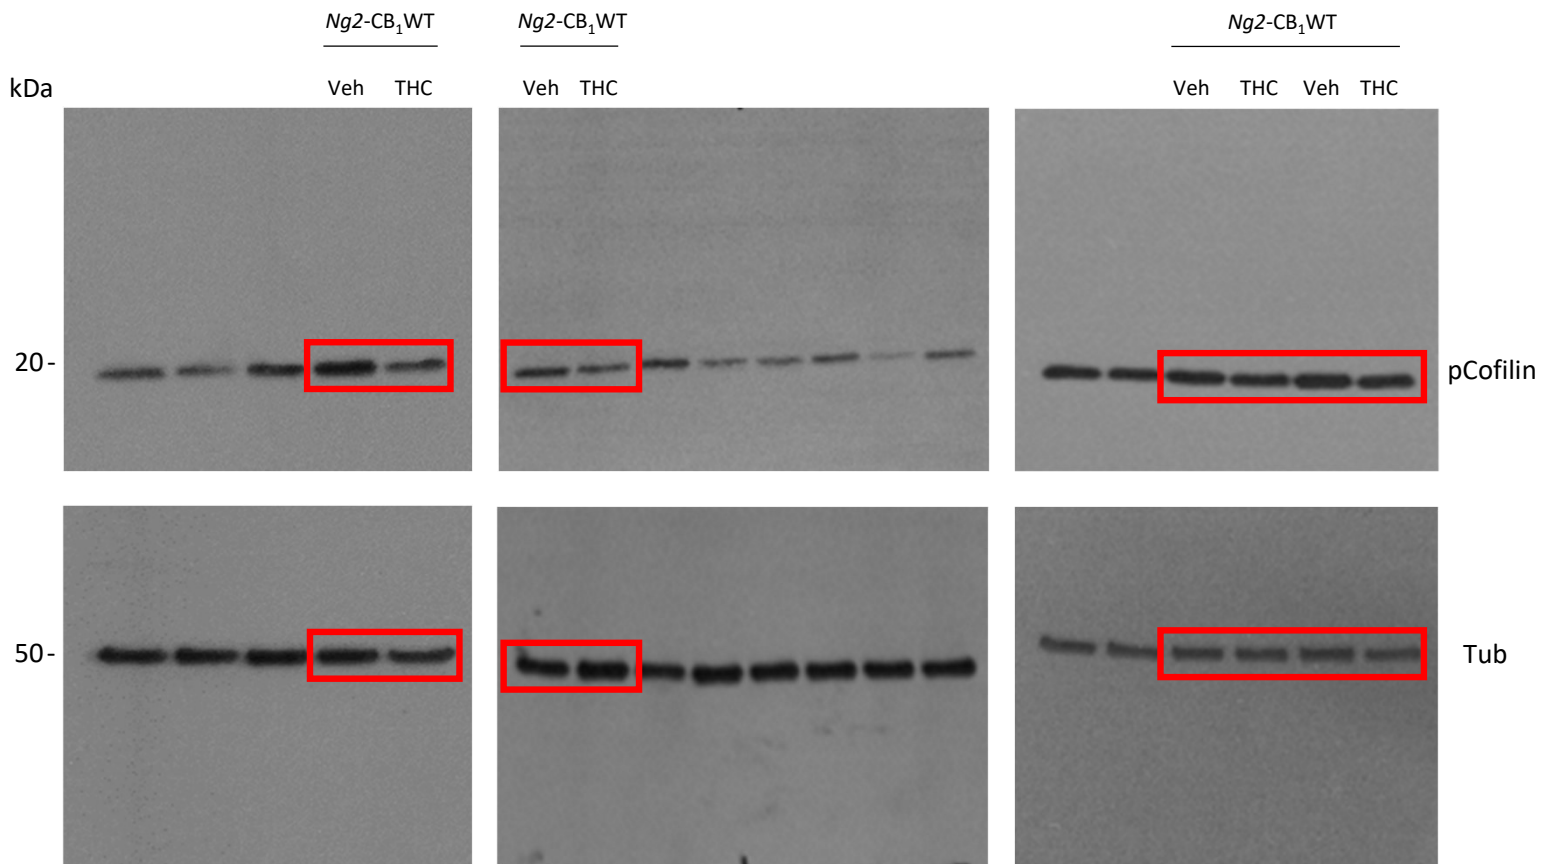

Biological replicates of western blot analysis shown in **Figure 4C**

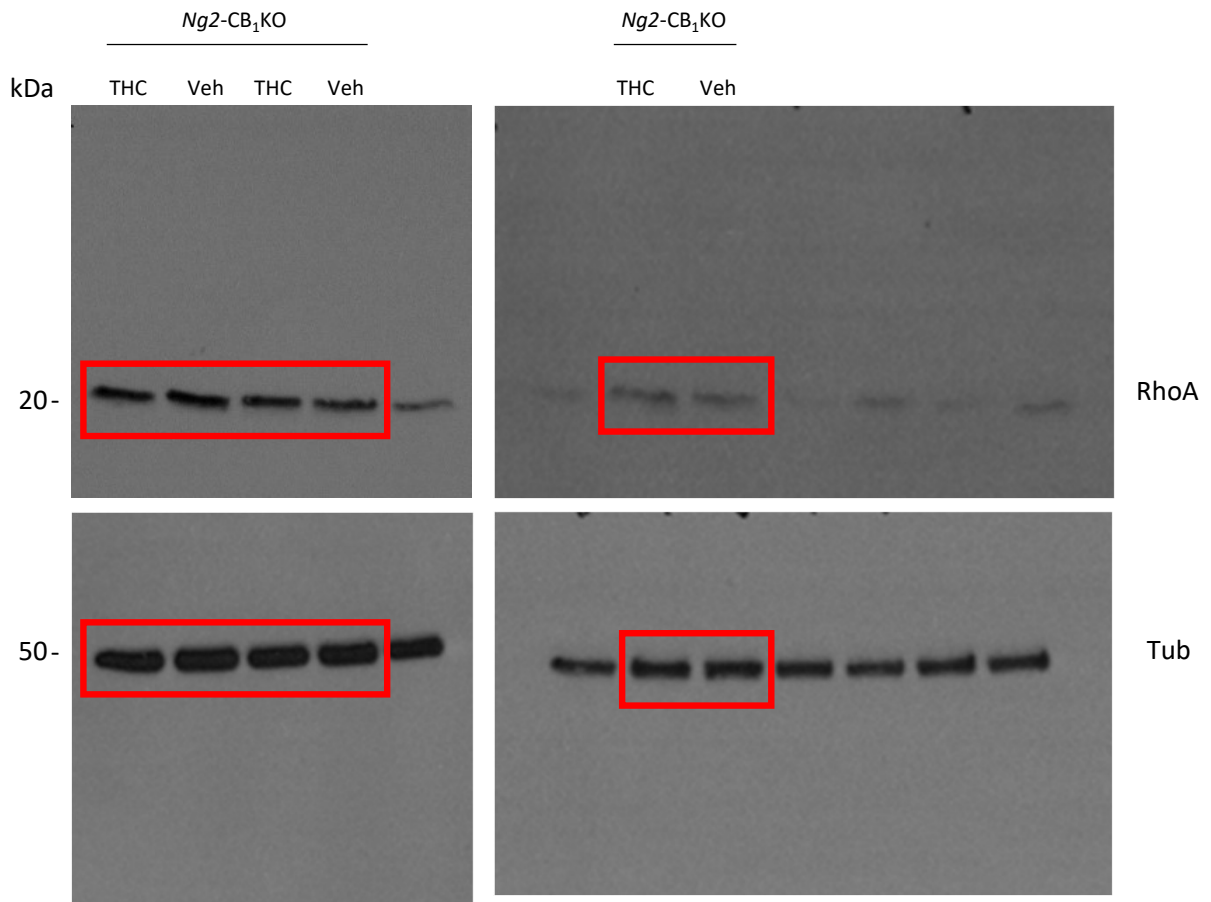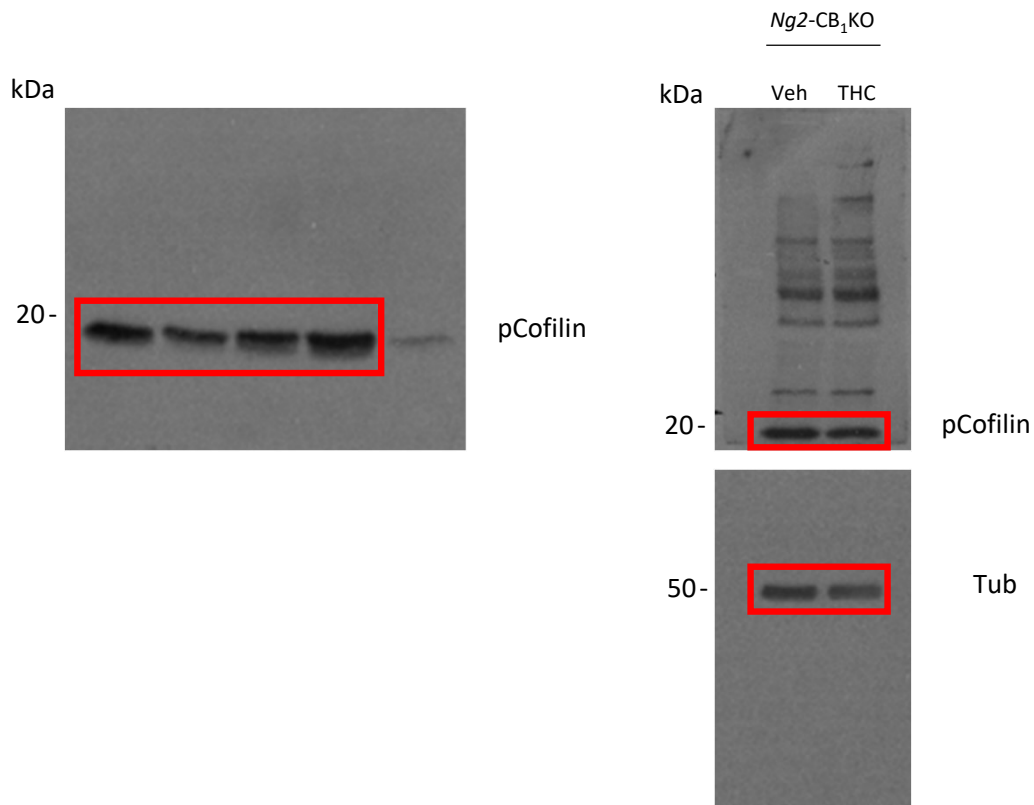

Biological replicates of western blot analysis shown in **Figure 4C**

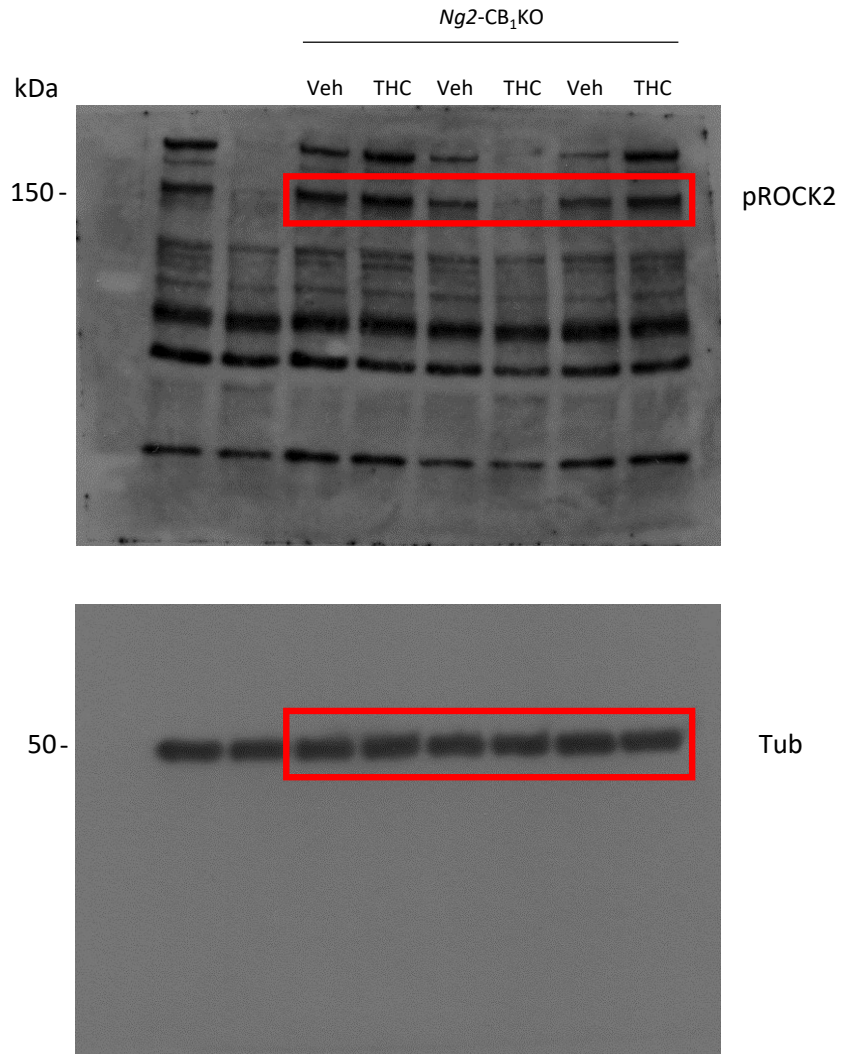

Biological replicates of western blot analysis shown in **Figure 4F**

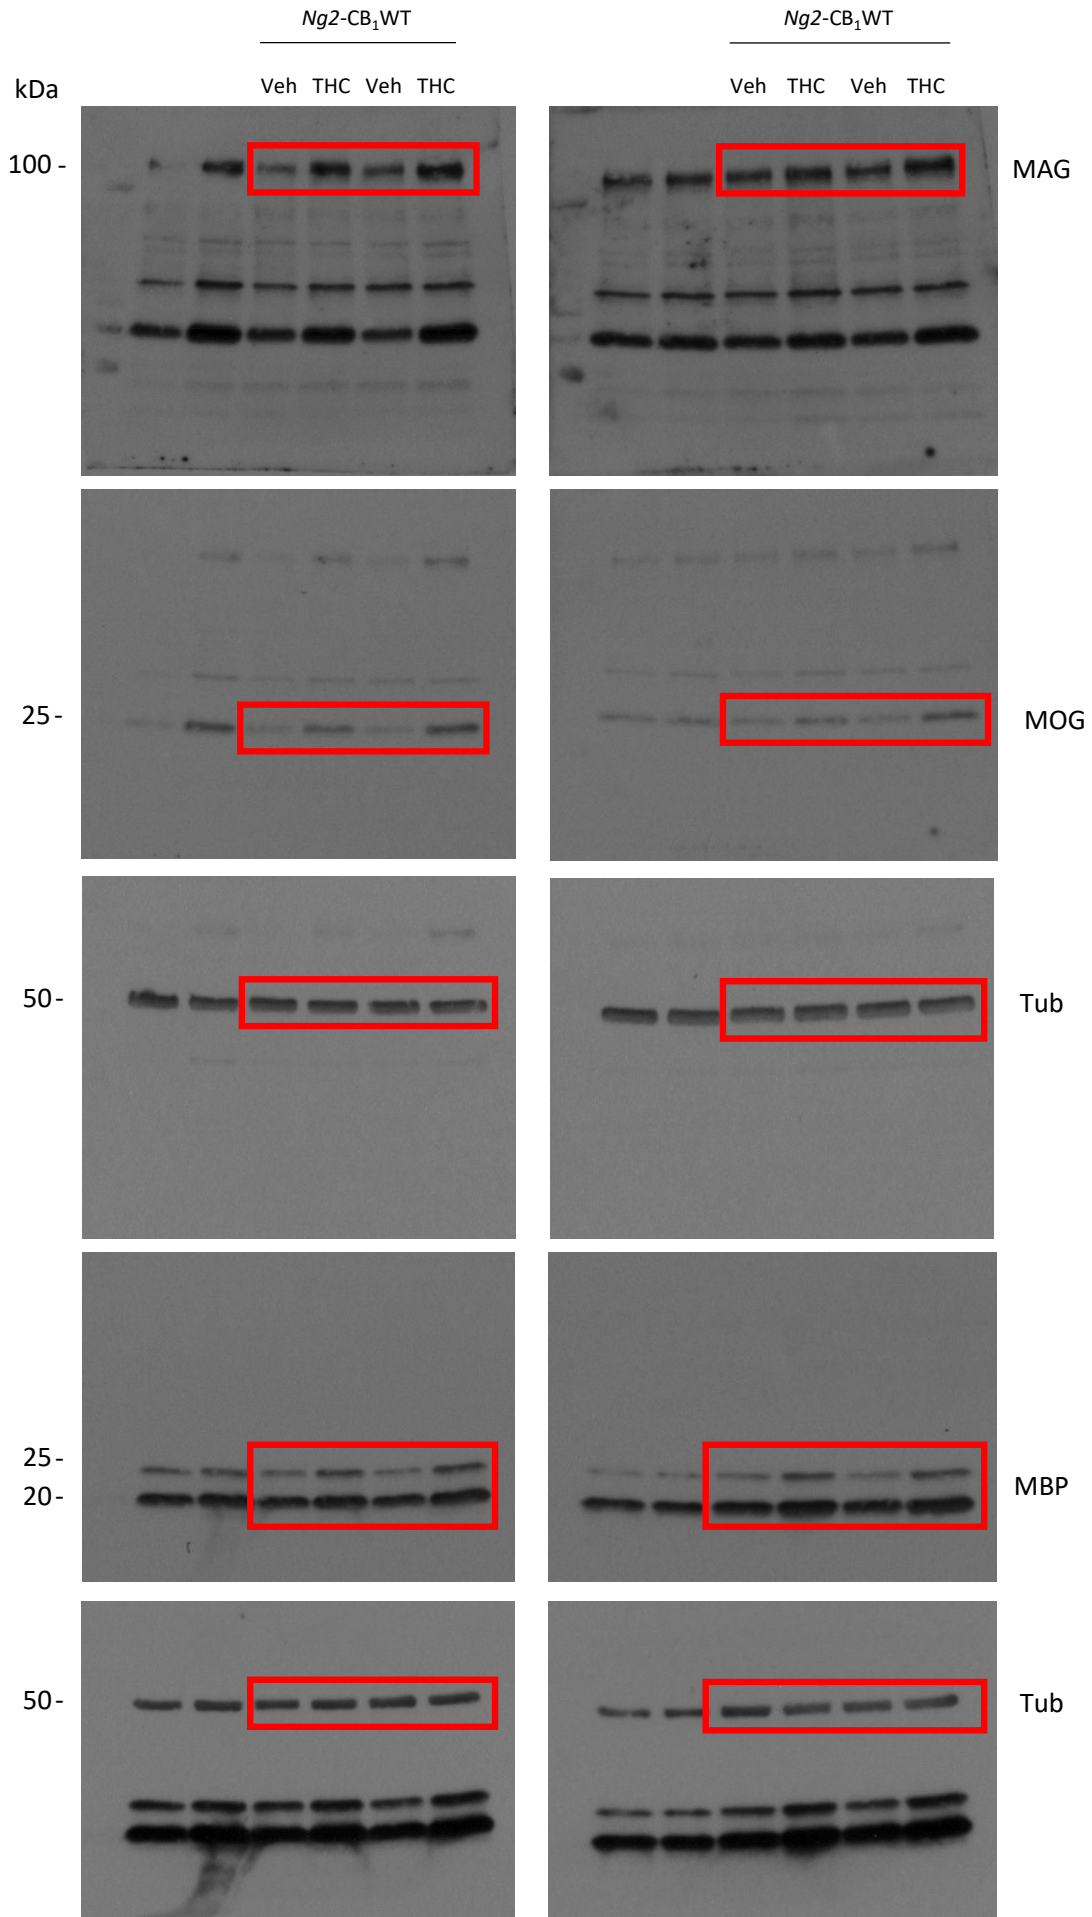

Biological replicates of western blot analysis shown in Figure 4F

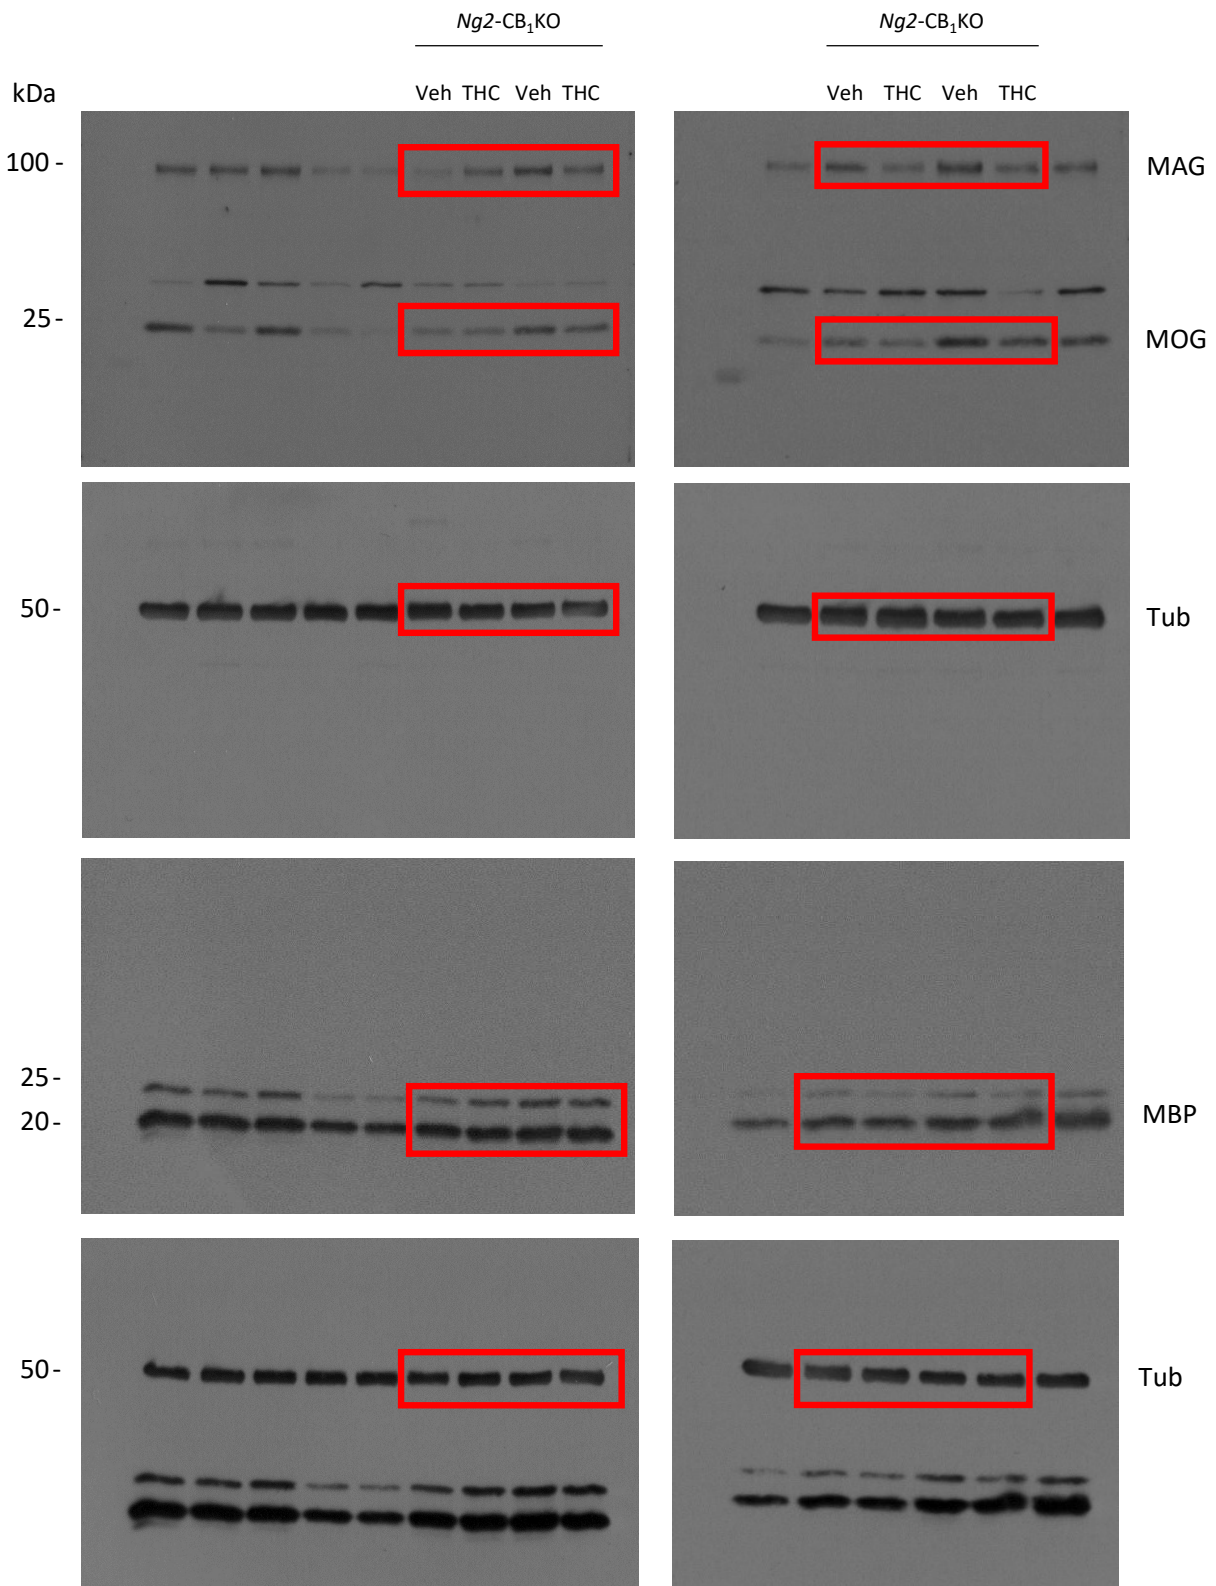

Biological replicates of western blot analysis shown in Figure 5A

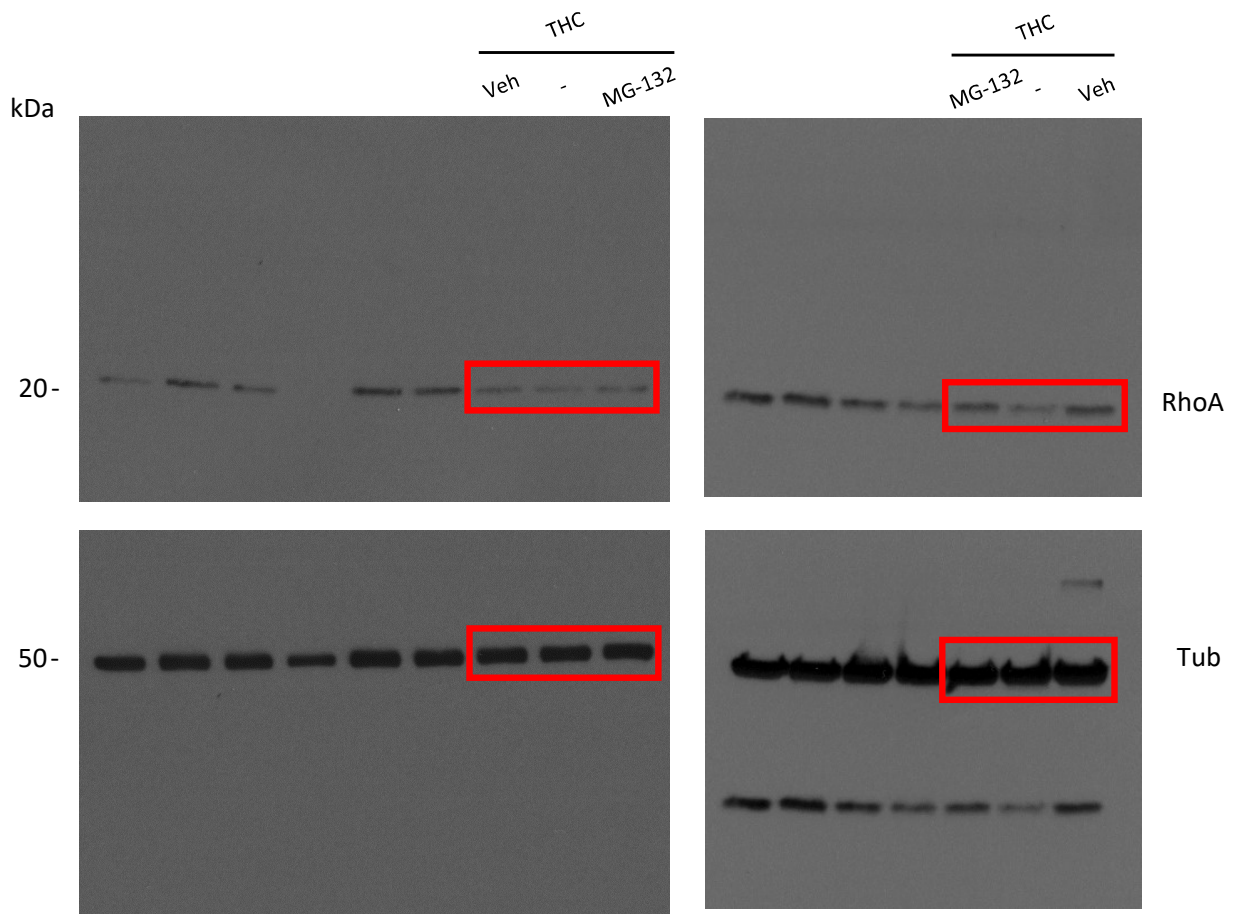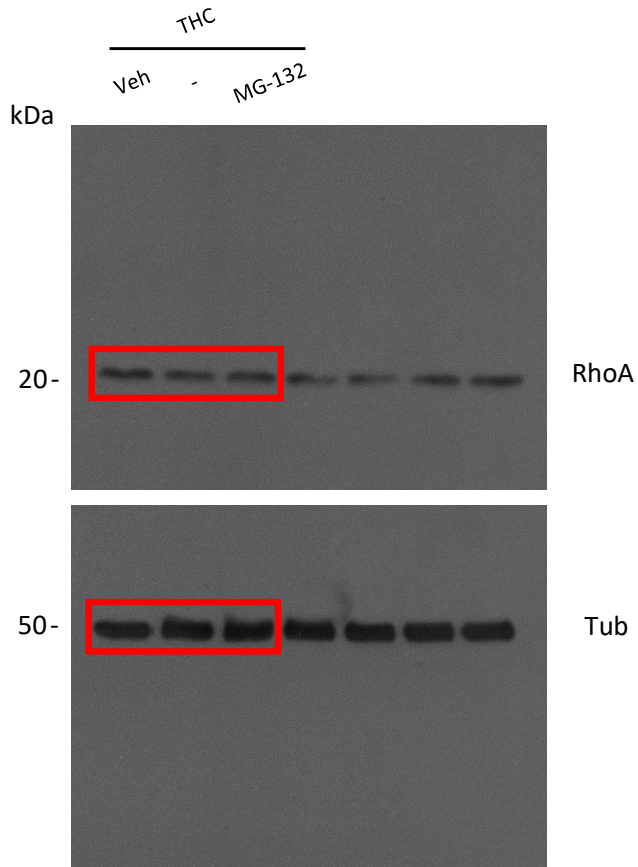

Biological replicates of western blot analysis shown in **Figure 6C**

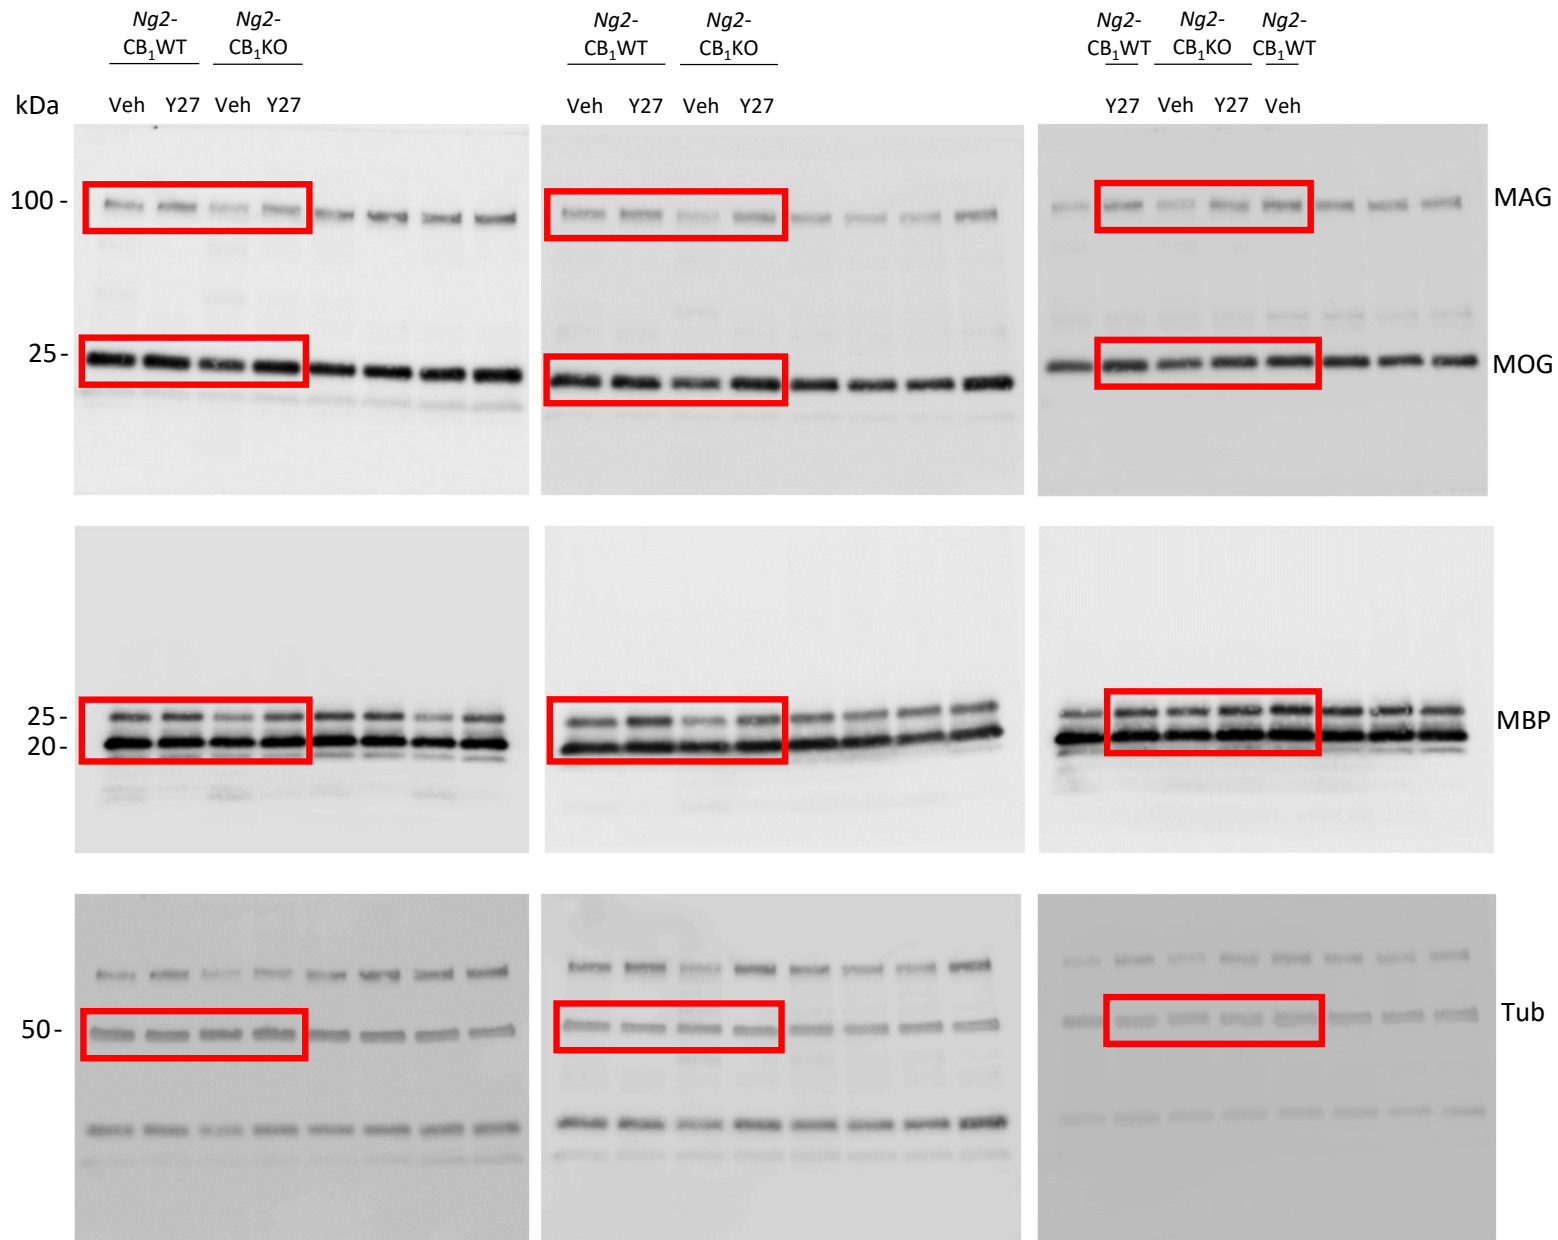

Supplement: MOESM2 [file 41419_2022_5032_MOESM2_ESM-1.pdf]
